# Supplementary material for: Immunological markers of Plasmodium vivax exposure and immunity: a systematic review and meta-analysis
Source: PubMed Central journal article supplement (PMC4172944; doi:10.1186/s12916-014-0150-1), 2014-09-09
Supplement: 12916_2014_150_MOESM2_ESM.pdf [file 12916_2014_150_MOESM2_ESM.pdf]

## Additional file 2: Full search strategy for Pubmed database

| Database | Search string                                                                                                                                                                                                                                                                                                                                                                                                                                                                                                                                                                                                                                                                                          | Qualifiers / Filters                                                                       | Results |
|----------|--------------------------------------------------------------------------------------------------------------------------------------------------------------------------------------------------------------------------------------------------------------------------------------------------------------------------------------------------------------------------------------------------------------------------------------------------------------------------------------------------------------------------------------------------------------------------------------------------------------------------------------------------------------------------------------------------------|--------------------------------------------------------------------------------------------|---------|
| Pubmed   | malaria and vivax and plasmodium and<br>(immunoglobulin OR IgG OR antibody OR immunity<br>OR rhoptry OR microneme OR sporozoite OR CSP OR<br>circumsporozoite OR trap OR thrombospondin OR<br>merozoite OR MSP OR AMA OR DBP OR duffy<br>binding protein OR EBA OR EBP OR erythrocyte<br>binding* OR EMP OR erythrocyte membrane protein<br>OR RBL OR reticulocyte binding like proteins OR RBP<br>OR reticulocyte binding protein OR VSA OR variant<br>surface antigen OR VIR OR gametocyte OR<br>(transmission blocking (immunity OR protein OR<br>antibody)) OR Pvs25 OR ookinete surface protein OR<br>Pvs28 OR sexual stage surface protein OR Pvs230 OR<br>transmission-blocking target antigen) | Publication date: to<br>30-Nov-2013<br>Article types: journal<br>article<br>Species: human | 1,360   |
